# Supplementary material for: Effect of Ivermectin and Atorvastatin on Nuclear Localization of Importin Alpha and Drug Target Expression Profiling in Host Cells from Nasopharyngeal Swabs of SARS-CoV-2- Positive Patients
Source: MDPI journal article supplement (doi:10.3390/v13102084), 2021-10-15
Supplement: s1 [file s1]

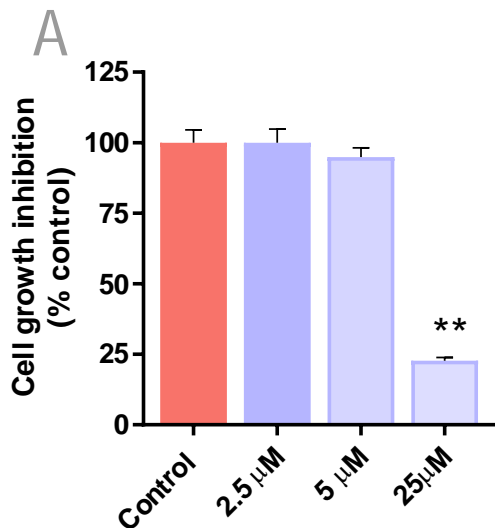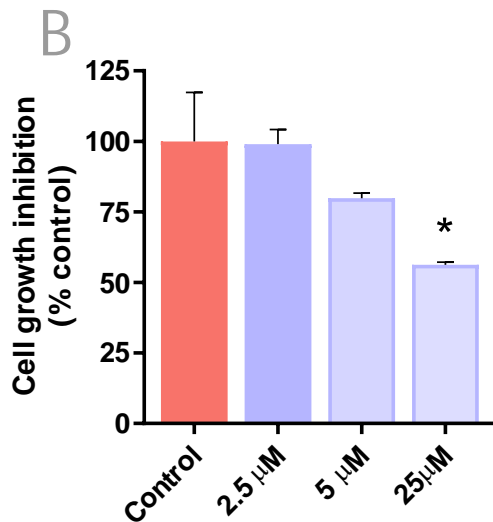

Figure S5. Effect of high IVM concentrations on cell growth.

(A) Hela and (B) Vero cells were treated with increased concentrations of IVM (2.5, 5 and 25  $\mu$ M) and cell viability was evaluated after 48h-incubation. Data were normalized to control cells and are shown as mean  $\pm$  SEM. Statistical significance: \* $p < 0.05$ ; \*\* $p < 0.01$  vs control group; Kruskal-Wallis followed by Dunn's multiple comparisons test.
