# Supplementary material for: Effect of Ivermectin and Atorvastatin on Nuclear Localization of Importin Alpha and Drug Target Expression Profiling in Host Cells from Nasopharyngeal Swabs of SARS-CoV-2- Positive Patients
Source: MDPI journal article supplement (doi:10.3390/v13102084), 2021-10-15
Supplement: s1 [file s1]

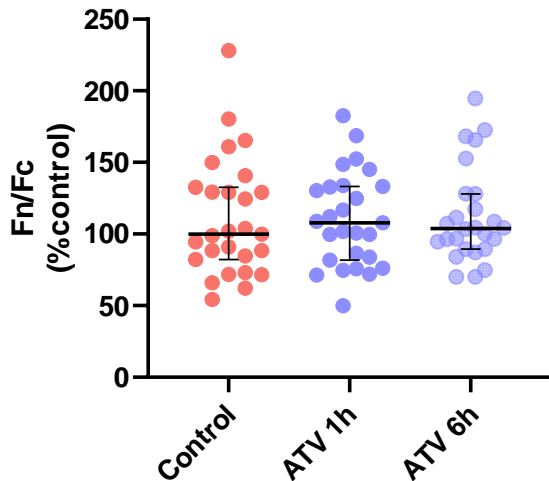

Figure S7. Effect of short term exposure ATV on importin  $\alpha$  nuclear accumulation. HeLa cells were treated with 10  $\mu$ M ATV for 1 or 6 h and importin  $\alpha$  cellular distribution was evaluated by confocal microscopy. Each data point represents Fn/Fc from a single cell; data were normalized to control cells and are indicated as median with interquartile range.
