# Supplementary material for: Effect of Ivermectin and Atorvastatin on Nuclear Localization of Importin Alpha and Drug Target Expression Profiling in Host Cells from Nasopharyngeal Swabs of SARS-CoV-2- Positive Patients
Source: MDPI journal article supplement (doi:10.3390/v13102084), 2021-10-15
Supplement: s1 [file s1]

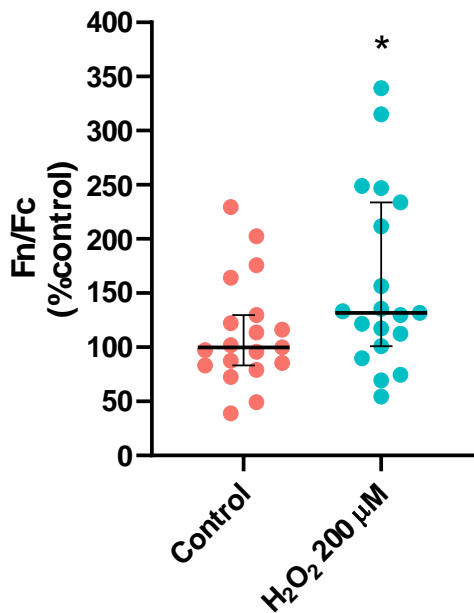

Figure S6. Nuclear accumulation of importin  $\alpha$  in response to oxidative stress. Hela cells were incubated with 200  $\mu$ M H<sub>2</sub>O<sub>2</sub> and nuclear to cytoplasmic importin  $\alpha$  distribution was evaluated by confocal microscopy. Each data point represents Fn/Fc from a single cell; data were normalized to control cells and are indicated as median with interquartile range. Statistical significance: \* $p < 0.05$ ; Mann-Whitney test.
