# Supplementary material for: Effect of Ivermectin and Atorvastatin on Nuclear Localization of Importin Alpha and Drug Target Expression Profiling in Host Cells from Nasopharyngeal Swabs of SARS-CoV-2- Positive Patients
Source: MDPI journal article supplement (doi:10.3390/v13102084), 2021-10-15
Supplement: s1 [file s1]

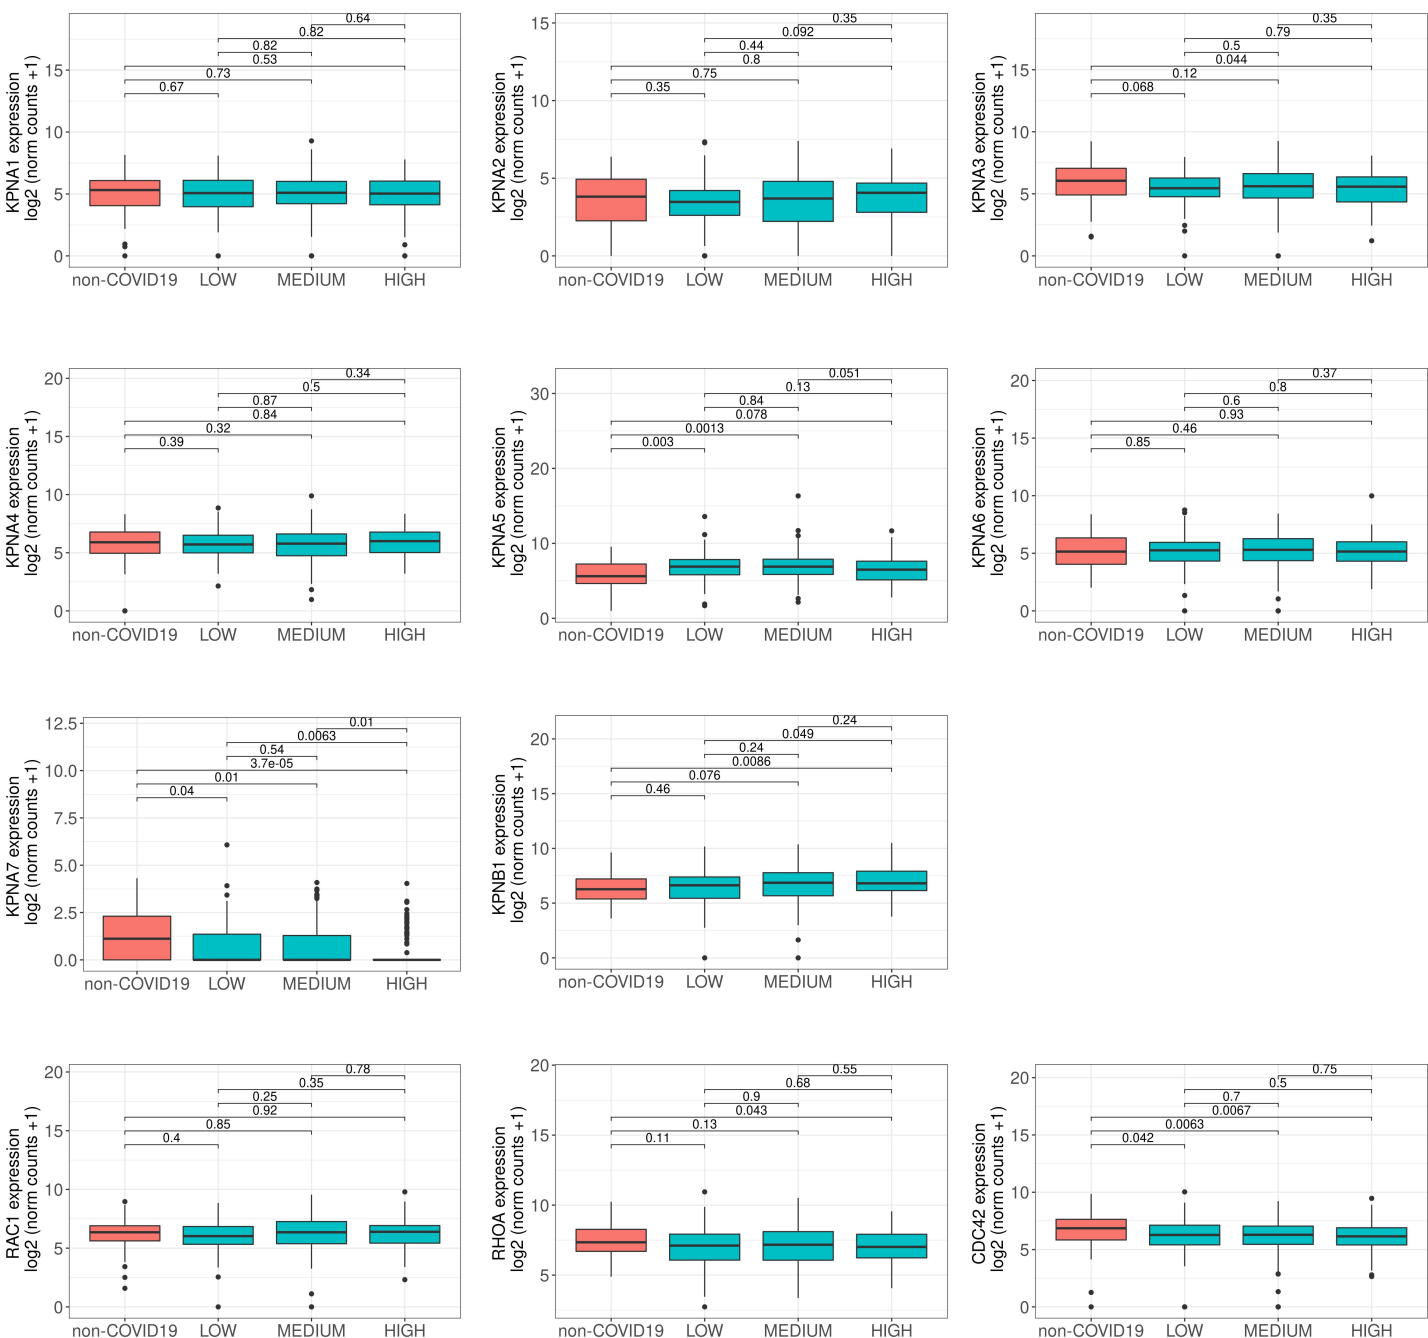

**Figure S2. Gene expression stratified by viral load.** Gene expression analysis of non-COVID-19 patients (red) and COVID-19 patients (blue) stratified by low (Ct > 24), medium (Ct = 24–19), and high (Ct < 19) viral load (GSE152075). Viral load was defined by the cycle threshold (Ct) of the N1 viral gene amplification during diagnostic PCR. (p values correspond to pairwise Wilcoxon rank-sum test)
