# Supplementary material for: Effect of Ivermectin and Atorvastatin on Nuclear Localization of Importin Alpha and Drug Target Expression Profiling in Host Cells from Nasopharyngeal Swabs of SARS-CoV-2- Positive Patients
Source: MDPI journal article supplement (doi:10.3390/v13102084), 2021-10-15
Supplement: s1 [file s1]

|                    |                      | Non-COVID-19 | COVID-19    | p-value            |
|--------------------|----------------------|--------------|-------------|--------------------|
| Number of patients |                      | 50           | 403         |                    |
| Sex                | Male                 | 22 (44%)     | 166 (41.2%) | 0.763 <sup>a</sup> |
|                    | Female               | 28 (56%)     | 187 (46.4%) |                    |
|                    | Unknown              | -            | 50 (12.4%)  |                    |
| Age                | Range                | 12-91        | 2-91        | 0.002 <sup>b</sup> |
|                    | Inter Quartile Range | 29-63        | 41-71       |                    |
|                    | Median               | 46.5         | 56          |                    |
|                    | Mean                 | 46.5         | 55.6        |                    |
|                    | < 30                 | 13 (26%)     | 41 (10.2%)  | 0.012 <sup>c</sup> |
|                    | 30s                  | 5 (10%)      | 51 (12.7%)  |                    |
|                    | 40s                  | 10 (20%)     | 55 (13.6%)  |                    |
|                    | 50s                  | 7 (14%)      | 80 (19.9%)  |                    |
|                    | 60s                  | 8 (16%)      | 50 (12.4%)  |                    |
|                    | ≥ 70                 | 7 (14%)      | 110 (27.3%) |                    |
|                    | Unknown              | -            | 16 (3.9%)   |                    |

**Table S1. Patients demographics for GSE152075 dataset.**

Table contains the number and % of COVID-19 and non-COVID-19 patients according to sex and age.

<sup>a</sup> Fisher's exact; <sup>b</sup> Student's t test; <sup>c</sup> Chi-square test.
