# Supplementary material for: Effect of Ivermectin and Atorvastatin on Nuclear Localization of Importin Alpha and Drug Target Expression Profiling in Host Cells from Nasopharyngeal Swabs of SARS-CoV-2- Positive Patients
Source: MDPI journal article supplement (doi:10.3390/v13102084), 2021-10-15
Supplement: s1 [file s1]

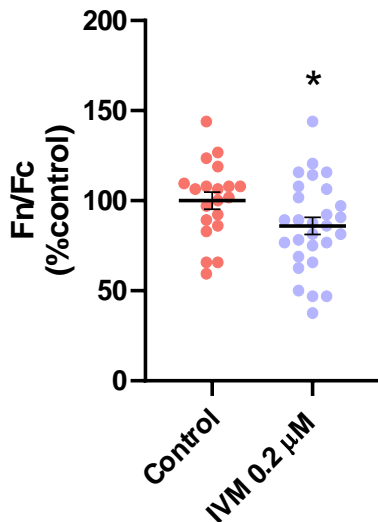

Figure S8. Impact of IVM at low concentration on nuclear accumulation of pp53. HeLa cells were exposed to 0.2  $\mu\text{M}$  IVM for 24 h and cellular distribution of pp53, one of the importin  $\alpha$  cargo proteins, was evaluated. Each data point represents Fn/Fc from a single cell; data were normalized to control cells and are indicated as mean  $\pm$  SEM. Statistical significance: \* $p < 0.05$ ; Unpaired t test.
