# Supplementary material for: Effect of Ivermectin and Atorvastatin on Nuclear Localization of Importin Alpha and Drug Target Expression Profiling in Host Cells from Nasopharyngeal Swabs of SARS-CoV-2- Positive Patients
Source: MDPI journal article supplement (doi:10.3390/v13102084), 2021-10-15
Supplement: s1 [file s1]

A

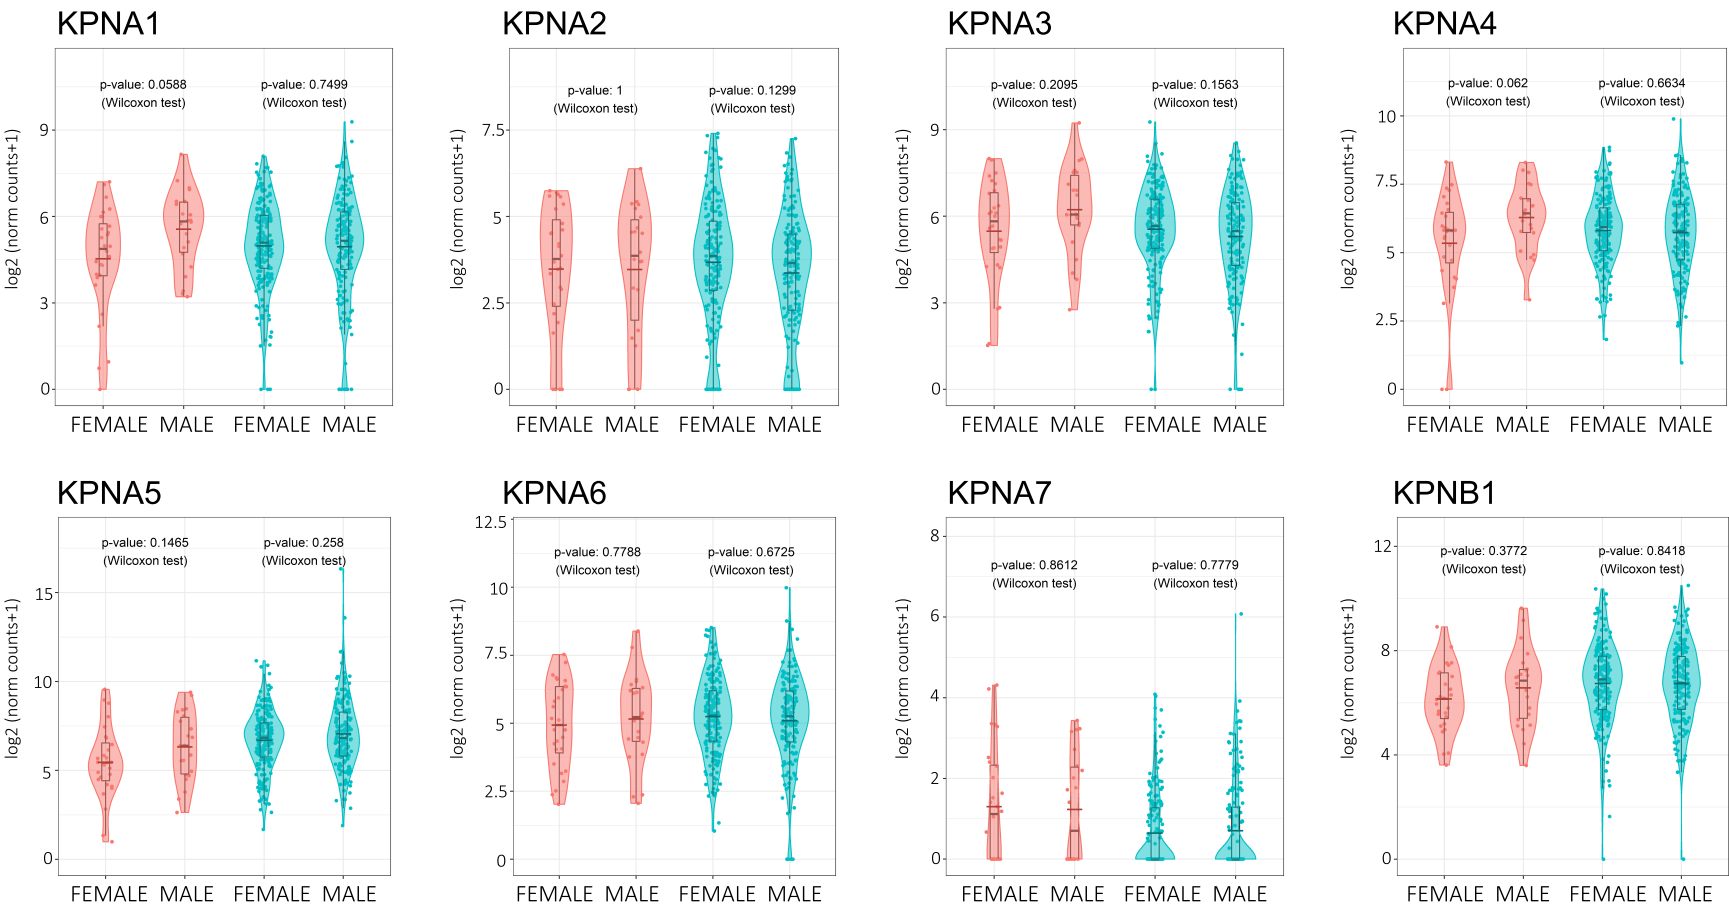

B

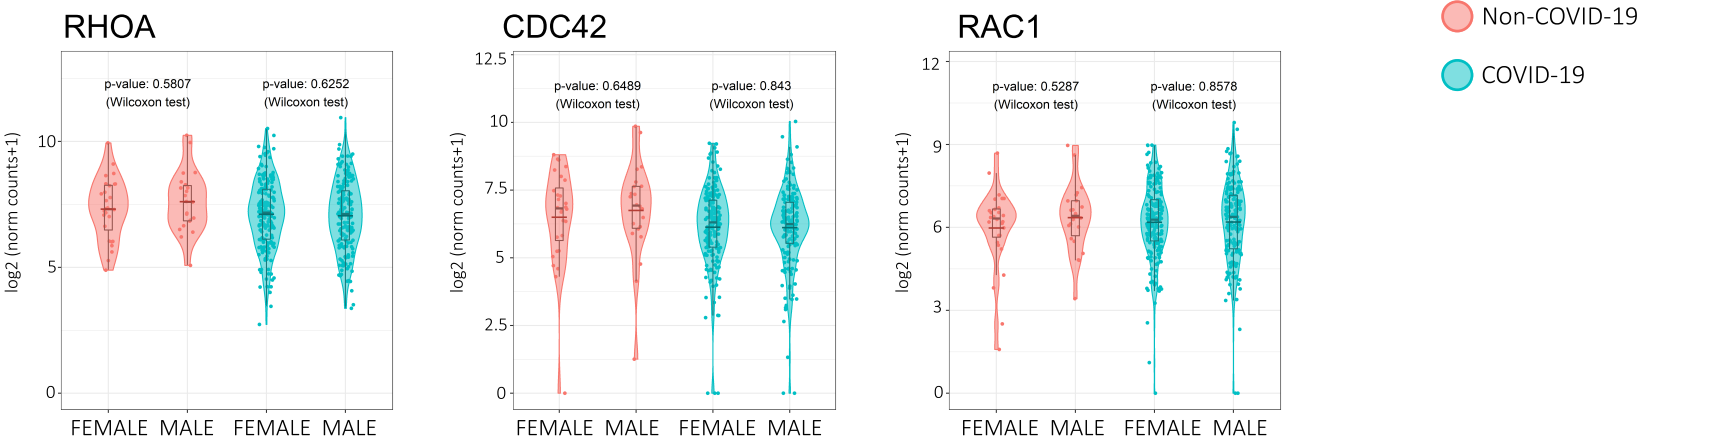

● Non-COVID-19  
● COVID-19

**Figure S1: Gene expression in COVID-19 and non-COVID-19 patients categorized by sex.**  
**A.** Gene expression analysis for the importin family genes comparing COVID-19 and non-COVID19 patients from GSE152075 dataset categorized by sex. **B.** Gene expression analysis for the Rho-GTPase family genes comparing COVID-19 and non-COVID19 patients from GSE152075 dataset categorized by sex.
